# Supplementary material for: Acute brain injuries trigger microglia as an additional source of the proteoglycan NG2
Source: PubMed Central journal article supplement (PMC7449013; doi:10.1186/s40478-020-01016-2), 2020-08-26
Supplement: 40478_2020_1016_MOESM1_ESM.pdf [file 40478_2020_1016_MOESM1_ESM.pdf]

## Supplementary Figures

### Acute brain injuries trigger microglia as an additional source of the proteoglycan NG2

Wenhui Huang<sup>1\*</sup>, Xianshu Bai<sup>1</sup>, Erika Meyer<sup>1,2</sup> and Anja Scheller<sup>1\*</sup>

1. Molecular Physiology, Center for Integrative Physiology and Molecular Medicine, University of Saarland, D-66421 Homburg, Germany
2. Laboratory of Brain Ischemia and Neuroprotection, Department of Pharmacology and Therapeutics, State University of Maringá, CEP-87020900, Maringá, Brazil

(\*) To whom correspondence should be addressed.

#### Wenhui Huang:

Molecular Physiology, Center for Integrative Physiology and Molecular Medicine, Building 48, University of Saarland, 66421 Homburg, Germany

**Email:** wenhui.huang@uks.eu

**Phone:** +49 6841 1616 446

#### Anja Scheller:

Molecular Physiology, Center for Integrative Physiology and Molecular Medicine, Building 48, University of Saarland, 66421 Homburg, Germany

**Email:** anja.scheller@uks.eu

**Phone:** +49 6841 1616 460

+49 6841 1616 443

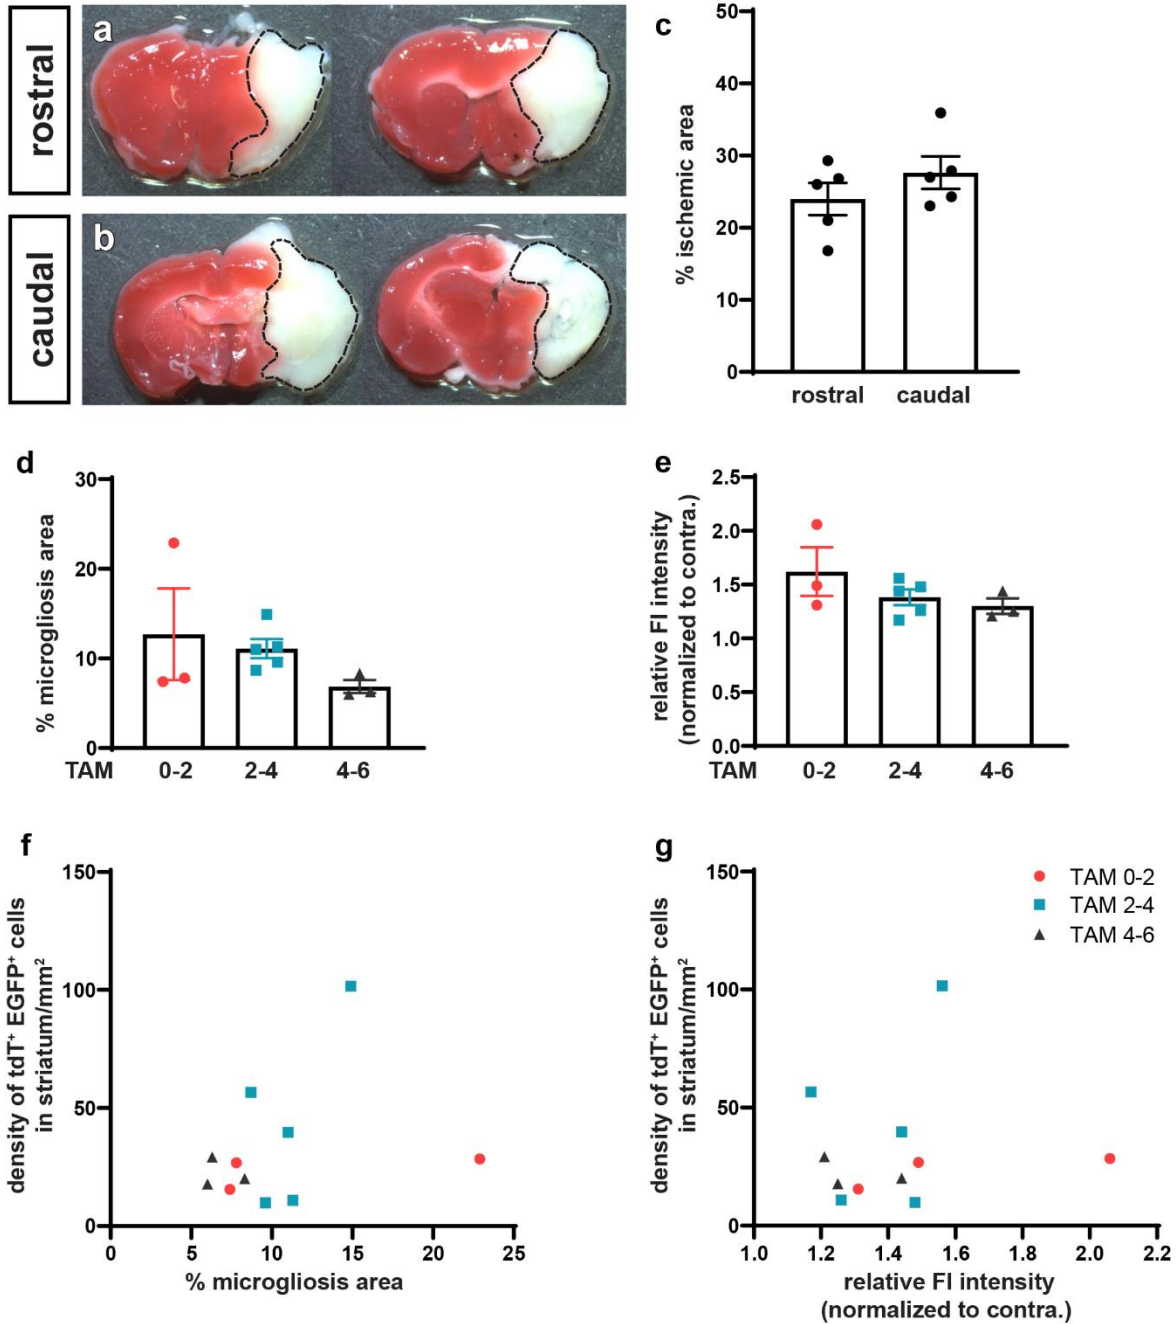

**Supplementary Figure S1.** Assessment of infarct-affected area in the brain.

**a and b** Images showing the TTC staining of coronal brain sections at rostral (**a**) and caudal (**b**) level 24 h after tMCAO. **c** Proportion of ischemic areas (as indicated in **a** and **b** by dashed line,  $n = 5$  mice). **d and e** Bar graphs quantify the percentage of microgliosis (as area) indicated by enhanced EGFP expression (**d**), and the relative fluorescent intensity (FI) of the ipsilateral brain normalized to the contralateral part of coronal sections (**e**) from mice in Figure 1f and 1g. **f and g** Data points of the density of tdT<sup>+</sup> EGFP<sup>+</sup> cells in striatum shown in Figure 1g were plotted with the corresponding data points in **d** and **e**. No obvious correlation between the density of tdT<sup>+</sup> EGFP<sup>+</sup> cells and the extent of microgliosis from each experimental time points could be detected.

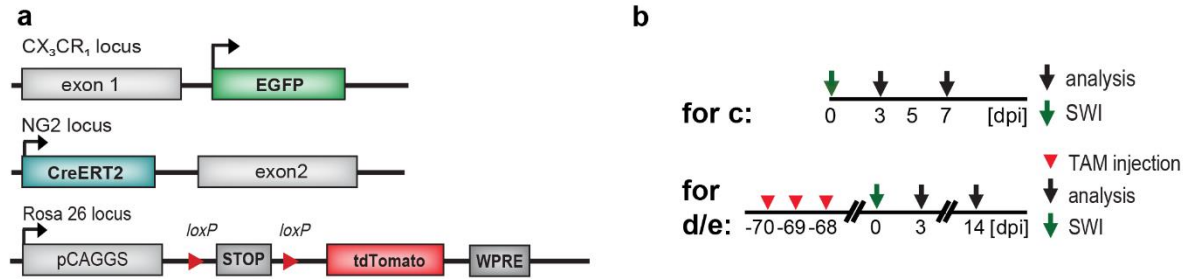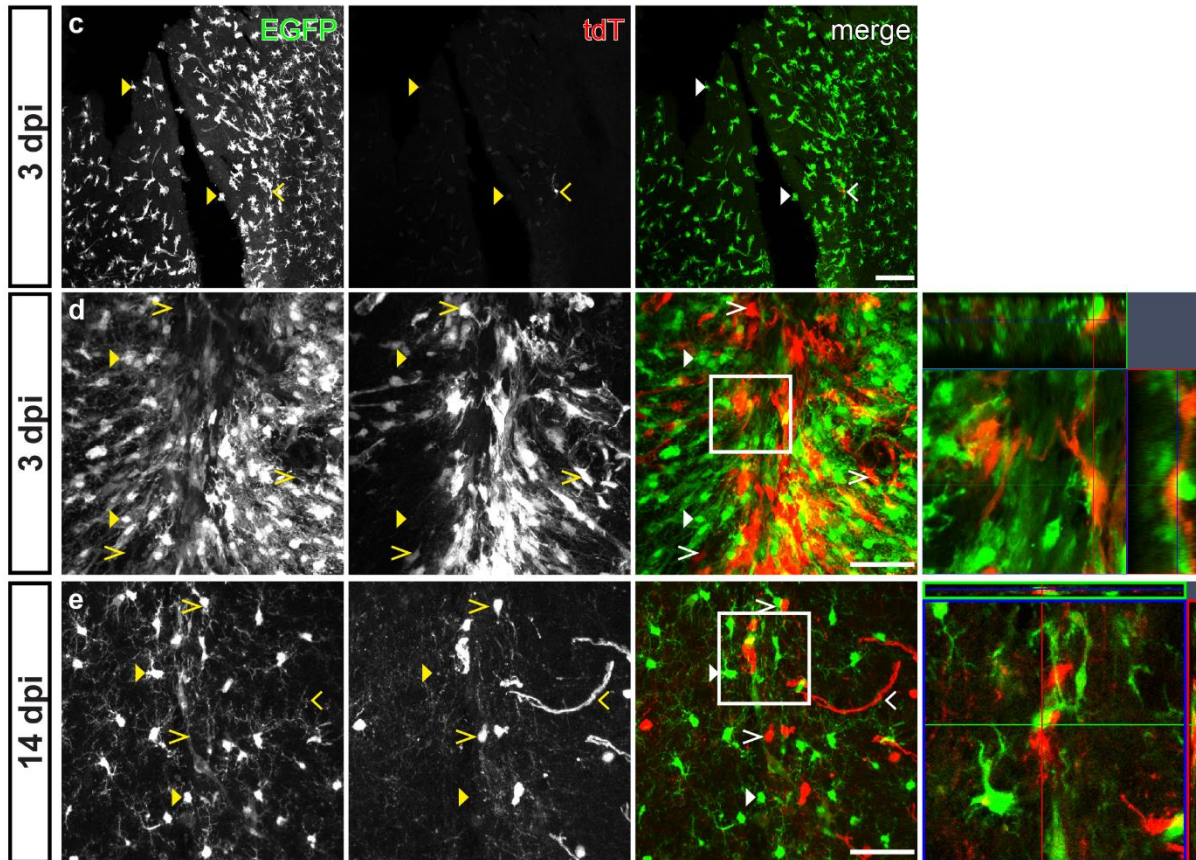

**Supplementary Figure S2.** After SWI  $tdT^+$   $EGFP^+$  cells were not derived from spontaneous recombination or pre-existing NG2-expressing cells.

**a** Overview of transgene structures of  $NG2^{tdT} \times CXCR^{EGFP}$  mice used in SWI model. **b**  $NG2^{tdT} \times CXCR^{EGFP}$  mice were used for SWI and analyzed at 3 or 7 dpi, without tamoxifen treatment (for **c**). In addition,  $NG2^{tdT} \times CXCR^{EGFP}$  mice were also injected with tamoxifen 70 days prior to SWI and analyzed at 3 or 14 dpi (for **d/e**). **c** Micrographs showing only sporadic  $tdT$  expression at the lesion site and never in  $EGFP^+$  cells without tamoxifen induced recombination. **d and e** Confocal images showing  $EGFP^+$  (triangles),  $tdT^+$  glial cells (open arrowheads), and  $tdT^+$  pericytes (open triangles) at the lesion sites at 3 (**d**) or 14 (**e**) dpi.  $EGFP$  and  $tdT$  signals were never co-localized as shown by orthogonal views of the white boxes, indicating that  $tdT^+$  cells did not differentiate into  $EGFP^+$  cells. Scale bars = 20  $\mu m$ .

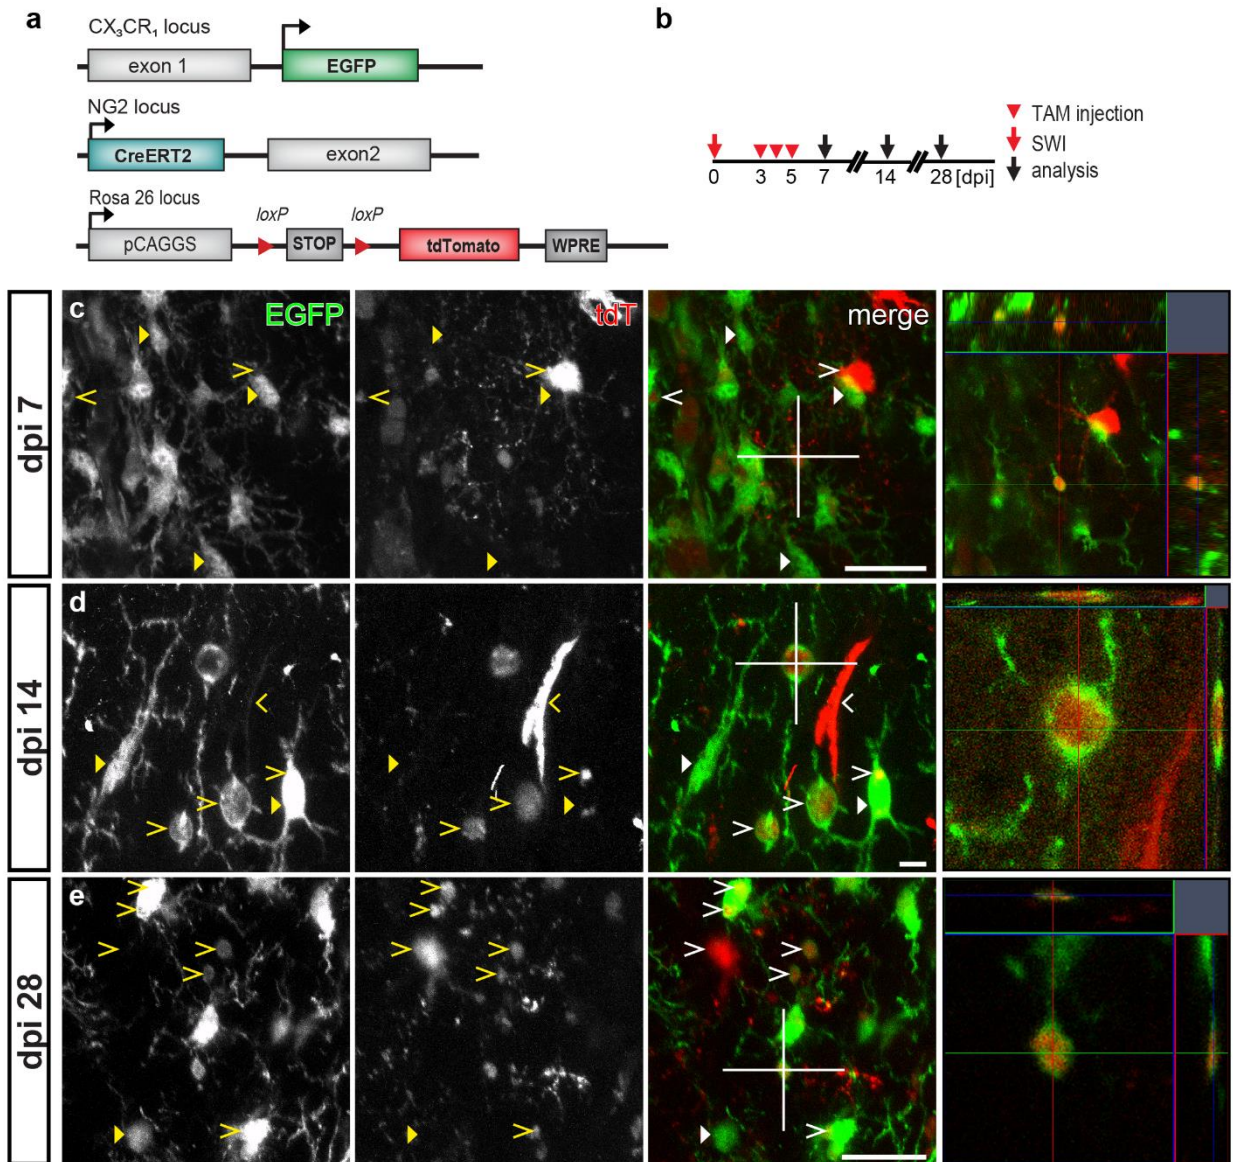

**Supplementary Figure S3.** Microglial phagocytosis of dying tdT<sup>+</sup> cells.

**a** Overview of transgene structures of NG2<sup>tdT</sup>xCXCR<sup>EGFP</sup> mice used in SWI model. **b** After SWI, NG2<sup>tdT</sup>xCXCR<sup>EGFP</sup> mice were injected with TAM from 3-5 dpi to induce Cre activity, and subsequently analyzed at 7, 14, or 28 dpi. **c-e** Confocal images showing EGFP<sup>+</sup> (triangles) and tdT<sup>+</sup> cells (open triangles) along the lesion site of NG2<sup>tdT</sup>xCXCR<sup>EGFP</sup> mice at 7 (**c**), 14 (**d**), and 28 (**e**) dpi. Notably, some condensed tdT<sup>+</sup> particles trapped in EGFP<sup>+</sup> cells (open arrowheads) could be always observed (**c-e**), indicating dying tdT<sup>+</sup> cells being phagocytosed by EGFP<sup>+</sup> microglia. Please note, that no overlay of tdT and EGFP can be observed. Orthogonal views of selected phagocytosing EGFP<sup>+</sup> cells (white cross) were shown at the right panel. Scale bars = 20  $\mu$ m.
